# Supplementary material
Source: Springer Nature journal article supplement (https://www.springermedizin.de/resource/supplementary/40248_2014_191_MOESM1_ESM.pdf/9686292)
Supplement: MOESM1 [file 9686292]

Identification of the causes of 'discomfort'  
(e.g. agitation, anxiety, pain, dyspnoea, disappointed expectations of the patient)

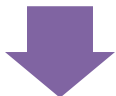

Structured assessment to identify causes of patient-related NIV failure

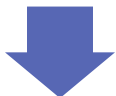

Attempt non-pharmacological remedy of 'discomfort'  
(E.g. sophrology, and/or patient education in advance of NIV)  
Special attention to effects of ill-fitting or inappropriate face masks on patient acceptance of NIV

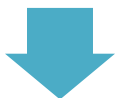

If difficulties persist - consider possible benefits of sedation as an adjunct to NIV
